# Supplementary material for: Secondary ligand-directed assembly of metal–organic coordination polymers based on a 2-(pyridin-4-yl)-1H-imidazole-4,5-dicarboxylic acid ligand: Syntheses, structures and photoluminescent properties
Source: Royal Society of Chemistry journal article supplement (doi:10.1039/c1ce06178j), 2012-01-01
Supplement: c1ce06178j.pdf [file c1ce06178j.pdf]

## Supplementary Information

**Secondary ligand-directed assembly of metal-organic coordination polymers based on 2-(pyridin-4-yl)-1H-imidazole-4,5-dicarboxylic acid ligand: syntheses, structures, photoluminescent properties**

**Gang Yuan, Kui-Zhan Shao, Dong-Ying Du, Xin-Long Wang, Zhong-Min Su\* and Jian-Fang Ma\***

Institute of Functional Material Chemistry, Faculty of Chemistry, Northeast Normal University, Changchun 130024, Jilin, People's Republic of China.

E-mail: zmsu@nenu.edu.cn; Tel: +86 431 8509 9108

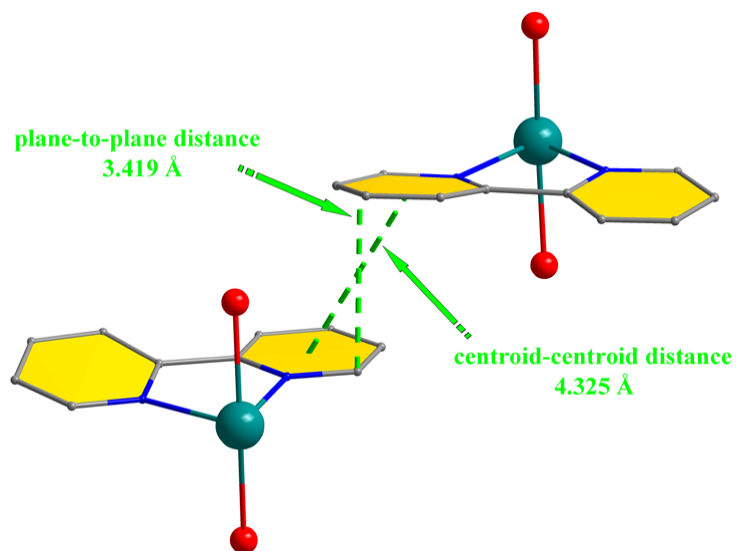

**Fig. S1** The  $\pi \cdots \pi$  interactions in complex 1.

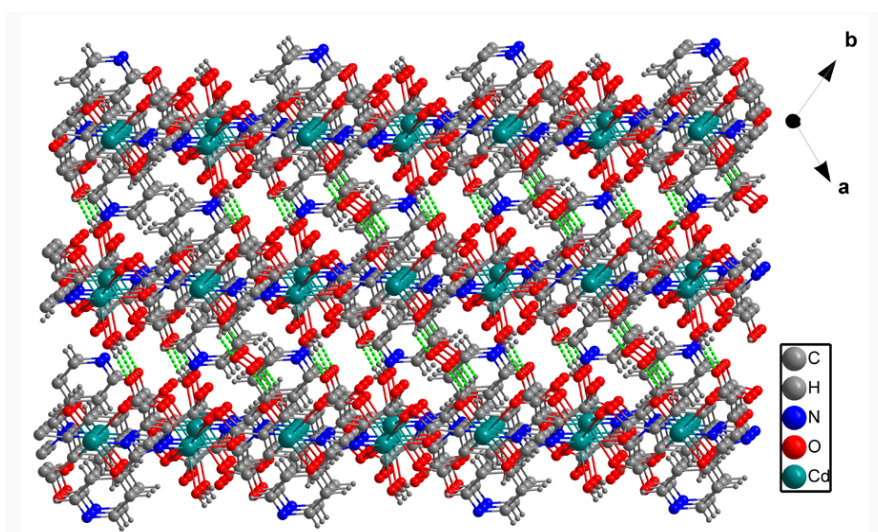

**Fig. S2** The 3D supramolecular framework constructed via hydrogen bonding interactions in complex 2.

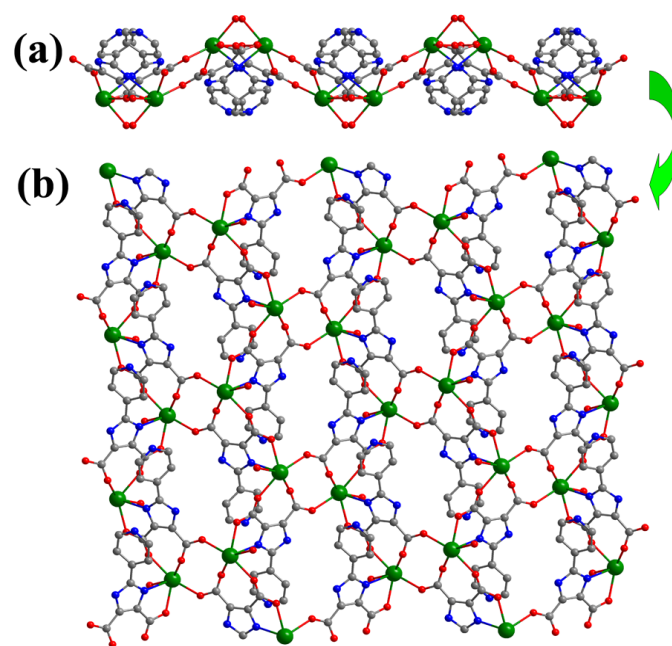

**Fig. S3** The 2-D layer built by HPIDC<sup>2-</sup> linking Eu<sup>III</sup> ions in **6** along *a*-axis (a) and *b*-axis (b).

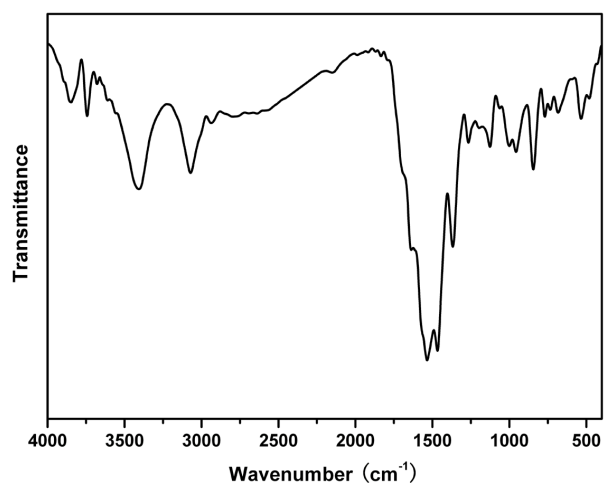

**Fig. S4** Infrared spectrum of **1**.

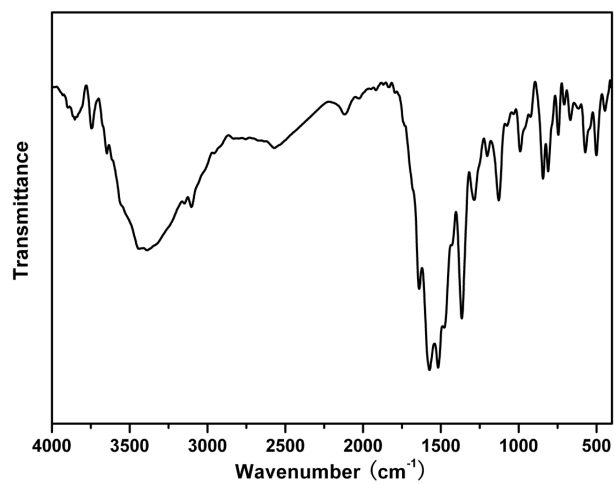

**Fig. S5** Infrared spectrum of **2**.

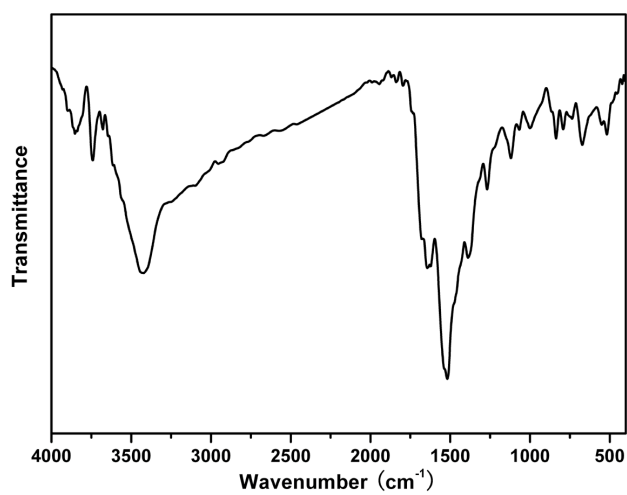

**Fig. S6** Infrared spectrum of **3**.

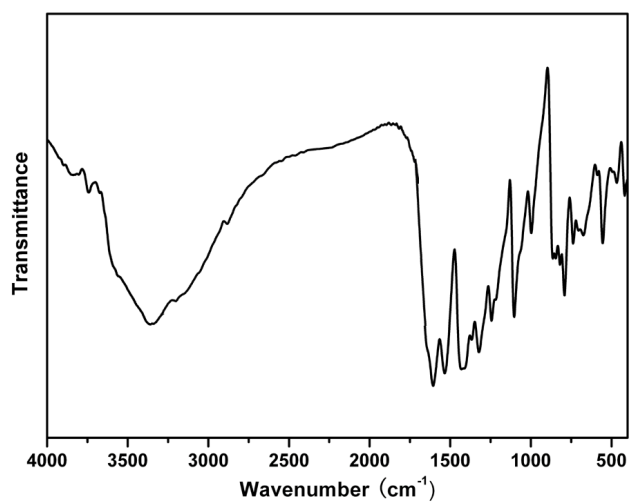

**Fig. S7** Infrared spectrum of **4**.

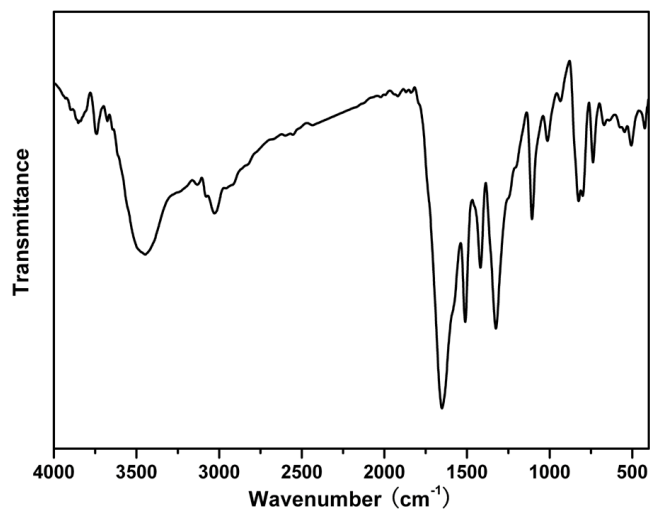

**Fig. S8** Infrared spectrum of **5**.

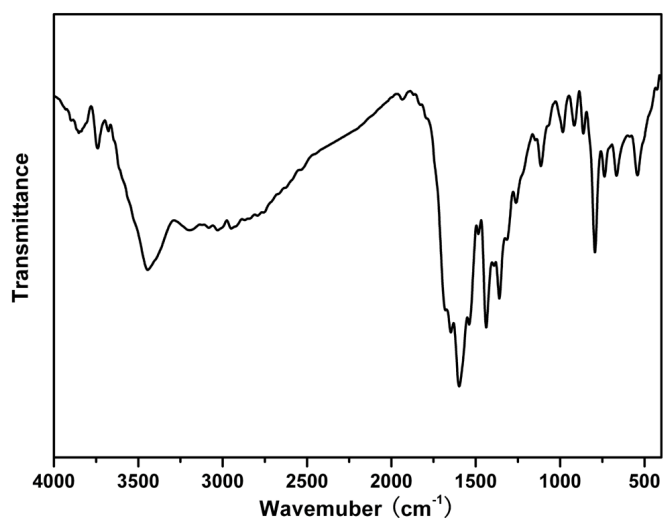

**Fig. S9** Infrared spectrum of **6**.

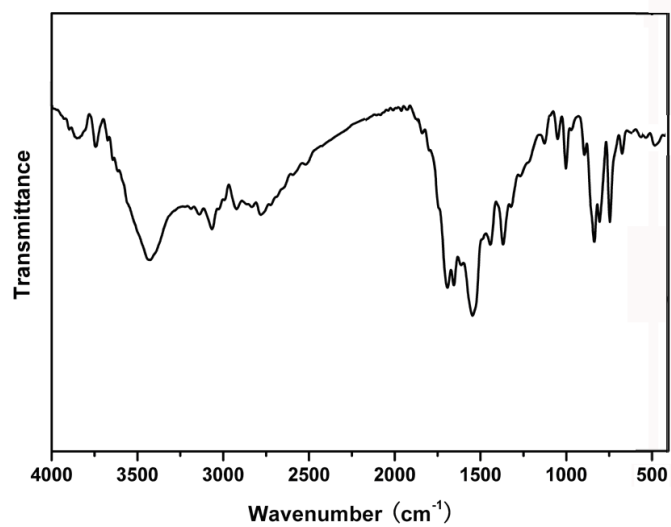

**Fig. S10** Infrared spectrum of **7**.

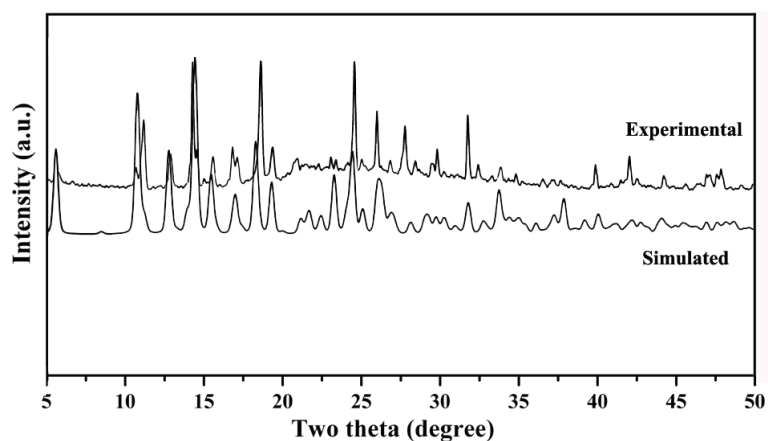

**Fig. S11** Experimental and simulated XRD patterns for **1**.

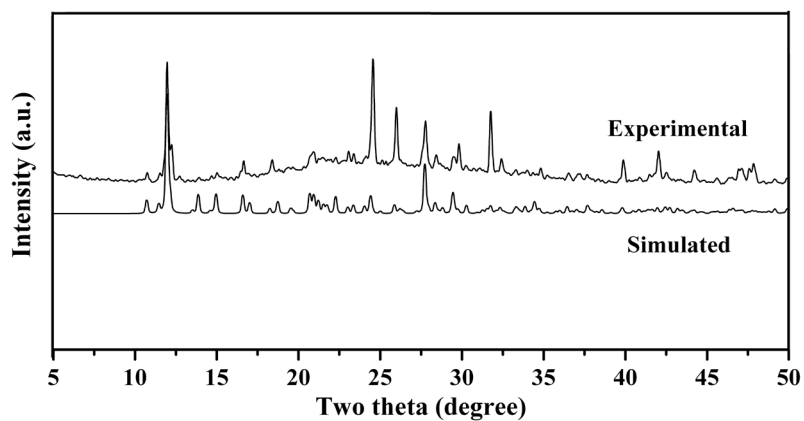

**Fig. S12** Experimental and simulated XRD patterns for **2**.

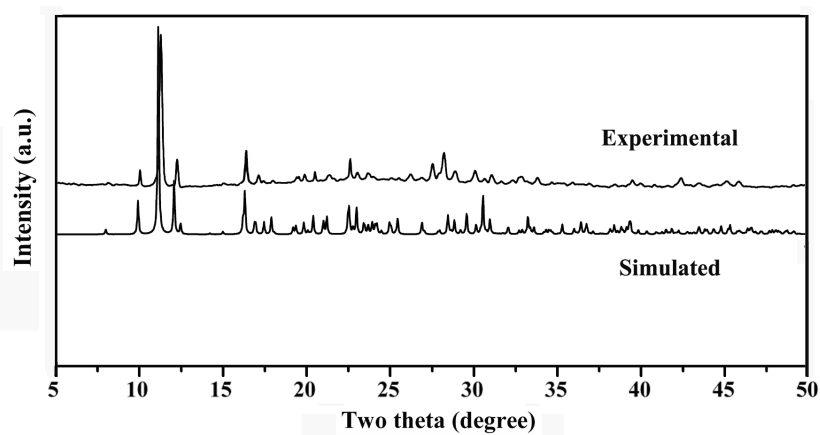

**Fig. S13** Experimental and simulated XRD patterns for **3**.

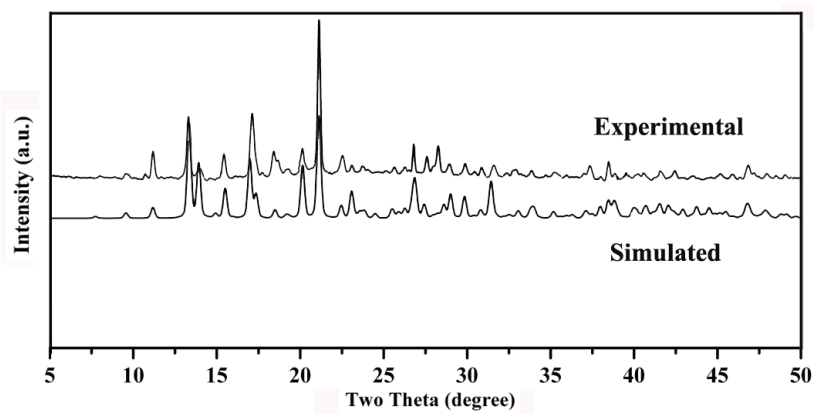

Fig. S14 Experimental and simulated XRD patterns for 4.

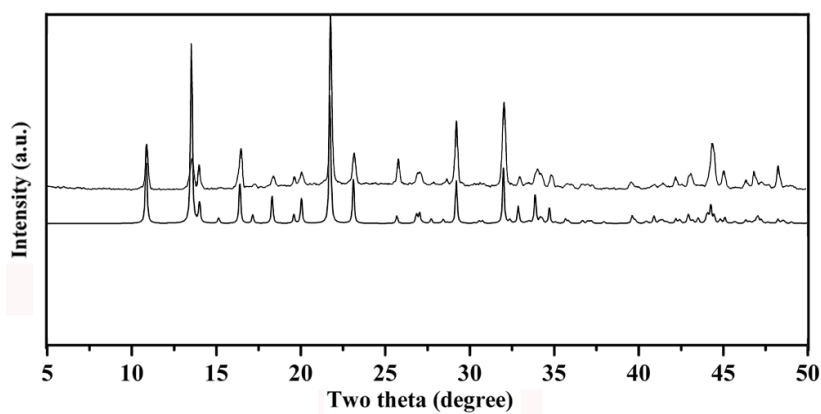

Fig. S15 Experimental and simulated XRD patterns for 5.

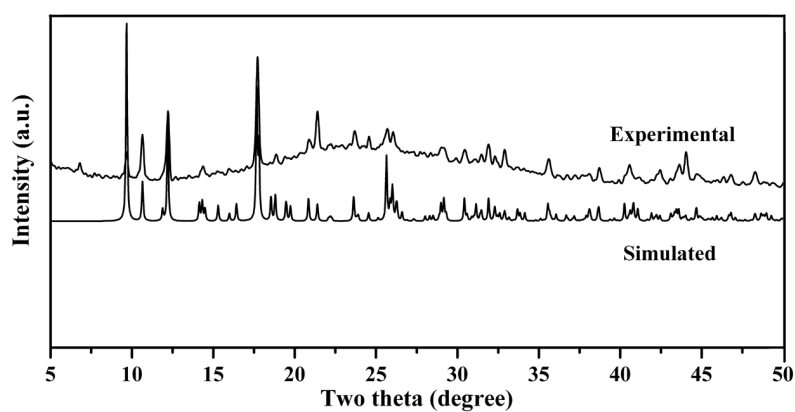

Fig. S16 Experimental and simulated XRD patterns for 6.

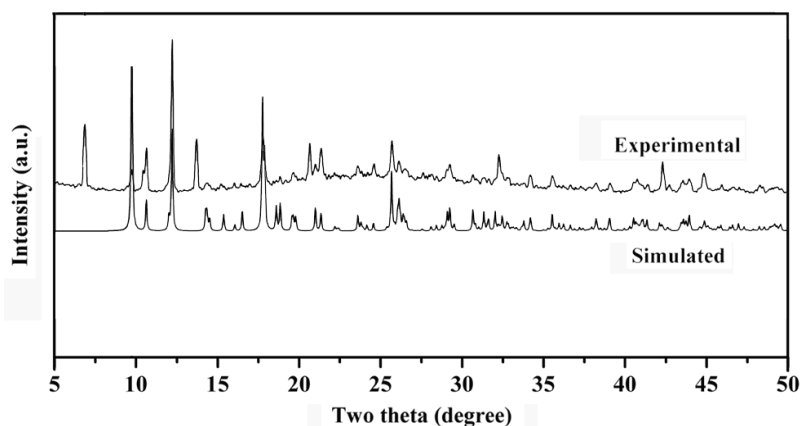

**Fig. S17** Experimental and simulated XRD patterns for **7**.

**Table S1.** Selected bond lengths and angles for **1–7**.

| <b>1</b>          |            |                 |            |
|-------------------|------------|-----------------|------------|
| Cd(1)-N(4)A       | 2.271(4)   | Cd(2)-N(5)      | 2.285(4)   |
| Cd(1)-N(1)        | 2.277(4)   | Cd(2)-N(2)      | 2.306(4)   |
| Cd(1)-N(3)C       | 2.366(4)   | Cd(2)-N(7)      | 2.306(5)   |
| Cd(1)-N(6)B       | 2.384(4)   | Cd(2)-N(8)      | 2.319(5)   |
| Cd(1)-O(1)        | 2.396(4)   | Cd(2)-O(4)      | 2.348(4)   |
| Cd(1)-O(5)A       | 2.403(4)   | Cd(2)-O(8)      | 2.360(4)   |
| N(4)A-Cd(1)-N(1)  | 143.09(13) | N(5)-Cd(2)-N(2) | 83.71(14)  |
| N(4)A-Cd(1)-N(3)C | 114.36(15) | N(5)-Cd(2)-N(7) | 110.15(17) |
| N(1)-Cd(1)-N(3)C  | 91.76(15)  | N(2)-Cd(2)-N(7) | 155.56(16) |
| N(4)A-Cd(1)-N(6)B | 92.66(15)  | N(5)-Cd(2)-N(8) | 158.79(17) |
| N(1)-Cd(1)-N(6)B  | 113.18(16) | N(2)-Cd(2)-N(8) | 102.31(17) |
| N(3)C-Cd(1)-N(6)B | 91.55(14)  | N(7)-Cd(2)-N(8) | 72.24(19)  |
| N(4)A-Cd(1)-O(1)  | 84.25(14)  | N(5)-Cd(2)-O(4) | 114.74(15) |
| N(1)-Cd(1)-O(1)   | 72.27(15)  | N(2)-Cd(2)-O(4) | 73.24(14)  |
| N(3)C-Cd(1)-O(1)  | 84.51(15)  | N(7)-Cd(2)-O(4) | 82.57(15)  |
| N(6)B-Cd(1)-O(1)  | 173.44(15) | N(8)-Cd(2)-O(4) | 86.43(17)  |
| N(4)A-Cd(1)-O(5)A | 72.25(15)  | N(5)-Cd(2)-O(8) | 73.15(14)  |
| N(1)-Cd(1)-O(5)A  | 83.12(15)  | N(2)-Cd(2)-O(8) | 116.57(15) |
| N(3)C-Cd(1)-O(5)A | 173.18(15) | N(7)-Cd(2)-O(8) | 87.23(16)  |
| N(6)B-Cd(1)-O(5)A | 86.37(16)  | N(8)-Cd(2)-O(8) | 86.09(16)  |
| O(1)-Cd(1)-O(5)A  | 98.14(12)  | O(4)-Cd(2)-O(8) | 168.81(12) |
| <b>2</b>          |            |                 |            |
| Cd(1)-O(4)        | 2.293(3)   | Cd(2)-O(1W)     | 2.327(4)   |
| Cd(1)-O(2W)       | 2.328(4)   | Cd(2)-N(1)      | 2.338(4)   |
| Cd(1)-N(2)        | 2.337(3)   | Cd(2)-O(1)      | 2.350(3)   |
| Cd(2)-O(8)        | 2.238(3)   | Cd(2)-O(5)B     | 2.407(3)   |
| Cd(2)-O(7)C       | 2.243(3)   |                 |            |
| O(4)A-Cd(1)-O(4)  | 180.000(1) | O(8)-Cd(2)-N(1) | 146.15(12) |



|                    |            |                   |            |
|--------------------|------------|-------------------|------------|
| O(4)-Cd(1)-O(2W)A  | 91.00(15)  | O(7)C-Cd(2)-N(1)  | 110.79(12) |
| O(4)-Cd(1)-O(2W)   | 89.00(15)  | O(1W)-Cd(2)-N(1)  | 87.35(13)  |
| O(2W)A-Cd(1)-O(2W) | 180.000(1) | O(8)-Cd(2)-O(1)   | 78.90(12)  |
| O(4)A-Cd(1)-N(2)   | 106.15(11) | O(7)C-Cd(2)-O(1)  | 162.62(12) |
| O(4)-Cd(1)-N(2)    | 73.85(11)  | O(1W)-Cd(2)-O(1)  | 110.08(12) |
| O(2W)A-Cd(1)-N(2)  | 87.10(15)  | N(1)-Cd(2)-O(1)   | 72.20(11)  |
| O(2W)-Cd(1)-N(2)   | 92.90(15)  | O(8)-Cd(2)-O(5)B  | 113.38(12) |
| N(2)-Cd(1)-N(2)A   | 180.000(1) | O(7)C-Cd(2)-O(5)B | 78.98(11)  |
| O(8)-Cd(2)-O(7)C   | 102.08(12) | O(1W)-Cd(2)-O(5)B | 157.82(11) |
| O(8)-Cd(2)-O(1W)   | 86.33(13)  | N(1)-Cd(2)-O(5)B  | 81.48(12)  |
| O(7)C-Cd(2)-O(1W)  | 87.27(12)  | O(1)-Cd(2)-O(5)B  | 84.70(11)  |

### 3

|                    |            |                    |            |
|--------------------|------------|--------------------|------------|
| Cd(1)-N(3)C        | 2.281(4)   | Cd(2)-O(1W)        | 2.225(4)   |
| Cd(1)-N(1)         | 2.313(3)   | Cd(2)-N(2)         | 2.283(3)   |
| Cd(1)-O(1)         | 2.313(3)   | Cd(2)-O(5)         | 2.290(3)   |
| Cd(1)-O(6)A        | 2.360(3)   | Cd(2)-O(4)         | 2.386(3)   |
| Cd(1)-Cl(1)        | 2.6059(18) | Cd(2)-O(5)D        | 2.520(3)   |
| Cd(1)-Cl(1)B       | 2.6939(15) | Cd(2)-Cl(1)E       | 2.7430(16) |
| N(3)C-Cd(1)-N(1)   | 99.75(12)  | O(1W)-Cd(2)-N(2)   | 93.17(13)  |
| N(3)C-Cd(1)-O(1)   | 170.26(12) | O(1W)-Cd(2)-O(5)   | 106.45(14) |
| N(1)-Cd(1)-O(1)    | 73.81(11)  | N(2)-Cd(2)-O(5)    | 155.83(12) |
| N(3)C-Cd(1)-O(6)A  | 96.91(13)  | O(1W)-Cd(2)-O(4)   | 160.51(12) |
| N(1)-Cd(1)-O(6)A   | 100.29(11) | N(2)-Cd(2)-O(4)    | 72.08(11)  |
| O(1)-Cd(1)-O(6)A   | 91.51(12)  | O(5)-Cd(2)-O(4)    | 85.43(11)  |
| N(3)C-Cd(1)-Cl(1)  | 94.69(9)   | O(1W)-Cd(2)-O(5)D  | 89.34(14)  |
| N(1)-Cd(1)-Cl(1)   | 165.54(8)  | N(2)-Cd(2)-O(5)D   | 95.35(11)  |
| O(1)-Cd(1)-Cl(1)   | 91.97(8)   | O(5)-Cd(2)-O(5)D   | 71.42(11)  |
| O(6)A-Cd(1)-Cl(1)  | 76.98(8)   | O(4)-Cd(2)-O(5)D   | 79.73(11)  |
| N(3)C-Cd(1)-Cl(1)B | 87.19(10)  | O(1W)-Cd(2)-Cl(1)E | 100.66(12) |
| N(1)-Cd(1)-Cl(1)B  | 96.51(9)   | N(2)-Cd(2)-Cl(1)E  | 82.46(9)   |
| O(1)-Cd(1)-Cl(1)B  | 86.32(10)  | O(5)-Cd(2)-Cl(1)E  | 106.92(8)  |
| O(6)A-Cd(1)-Cl(1)B | 161.74(8)  | O(4)-Cd(2)-Cl(1)E  | 90.18(9)   |
| Cl(1)-Cd(1)-Cl(1)B | 84.98(3)   | O(5)D-Cd(2)-Cl(1)E | 169.85(8)  |

### 4

|                   |            |                   |            |
|-------------------|------------|-------------------|------------|
| Cd(1)-O(6)B       | 2.249(3)   | Cd(2)-N(1)        | 2.238(4)   |
| Cd(1)-O(3)C       | 2.253(3)   | Cd(2)-O(1W)       | 2.265(4)   |
| Cd(1)-N(2)D       | 2.294(4)   | Cd(2)-O(2)A       | 2.297(3)   |
| Cd(1)-N(3)        | 2.307(4)   | Cd(2)-O(1)        | 2.446(3)   |
| Cd(1)-O(4)D       | 2.318(3)   | Cd(2)-O(1)A       | 2.533(4)   |
| Cd(2)-O(5)        | 2.213(4)   | O(5)-Cd(2)-O(2)A  | 89.99(13)  |
| O(6)B-Cd(1)-O(3)C | 85.85(12)  | N(1)-Cd(2)-O(2)A  | 144.87(13) |
| O(6)B-Cd(1)-N(2)D | 115.00(12) | O(1W)-Cd(2)-O(2)A | 93.98(14)  |
| O(3)C-Cd(1)-N(2)D | 156.39(13) | O(5)-Cd(2)-O(1)   | 171.98(13) |
| O(6)B-Cd(1)-N(3)  | 91.77(14)  |                   |            |

|                   |            |
|-------------------|------------|
| O(3)C-Cd(1)-N(3)  | 96.27(13)  |
| N(2)D-Cd(1)-N(3)  | 94.09(13)  |
| O(6)B-Cd(1)-O(4)D | 100.95(12) |
| O(3)C-Cd(1)-O(4)D | 92.99(12)  |
| N(2)D-Cd(1)-O(4)D | 73.03(11)  |
| N(3)-Cd(1)-O(4)D  | 164.78(13) |
| O(5)-Cd(2)-N(1)   | 109.46(13) |
| O(5)-Cd(2)-O(1W)  | 94.39(16)  |
| N(1)-Cd(2)-O(1W)  | 112.61(15) |

|                   |            |
|-------------------|------------|
| Zn(1)-O(3)        | 2.013(4)   |
| Zn(1)-O(1W)       | 2.055(4)   |
| Zn(1)-O(1)        | 2.066(4)   |
| O(3)-Zn(1)-O(1W)  | 101.07(17) |
| O(3)-Zn(1)-O(1)   | 163.54(16) |
| O(1W)-Zn(1)-O(1)  | 92.75(18)  |
| O(3)-Zn(1)-N(1)   | 106.87(16) |
| O(1W)-Zn(1)-N(1)  | 98.58(18)  |
| O(1)-Zn(1)-N(1)   | 79.52(15)  |
| O(3)-Zn(1)-O(4)A  | 80.59(15)  |
| O(1W)-Zn(1)-O(4)A | 169.95(17) |

|                   |            |
|-------------------|------------|
| Eu(1)-O(2)B       | 2.308(4)   |
| Eu(1)-O(3)B       | 2.362(3)   |
| Eu(1)-O(1)        | 2.391(3)   |
| Eu(1)-O(4)A       | 2.401(3)   |
| O(2)B-Eu(1)-O(3)B | 75.29(12)  |
| O(2)B-Eu(1)-O(1)  | 76.77(12)  |
| O(3)B-Eu(1)-O(1)  | 152.00(13) |
| O(2)B-Eu(1)-O(4)A | 128.67(13) |
| O(3)B-Eu(1)-O(4)A | 126.66(11) |
| O(1)-Eu(1)-O(4)A  | 71.46(12)  |
| O(2)B-Eu(1)-O(1W) | 147.47(12) |
| O(3)B-Eu(1)-O(1W) | 72.18(12)  |
| O(1)-Eu(1)-O(1W)  | 135.74(12) |
| O(4)A-Eu(1)-O(1W) | 73.58(12)  |
| O(2)B-Eu(1)-O(5)  | 128.92(13) |
| O(3)B-Eu(1)-O(5)  | 126.43(13) |
| O(1)-Eu(1)-O(5)   | 74.15(15)  |
| O(4)A-Eu(1)-O(5)  | 78.92(12)  |

|             |          |
|-------------|----------|
| Tb(1)-O(3)A | 2.274(5) |
| Tb(1)-O(2)A | 2.341(4) |
| Tb(1)-O(4)A | 2.364(4) |

|                   |            |
|-------------------|------------|
| N(1)-Cd(2)-O(1)   | 70.14(12)  |
| O(1W)-Cd(2)-O(1)  | 78.69(15)  |
| O(2)A-Cd(2)-O(1)  | 94.50(12)  |
| O(5)-Cd(2)-O(1)A  | 90.60(13)  |
| N(1)-Cd(2)-O(1)A  | 95.60(12)  |
| O(1W)-Cd(2)-O(1)A | 147.63(14) |
| O(2)A-Cd(2)-O(1)A | 54.00(10)  |
| O(1)-Cd(2)-O(1)A  | 97.41(6)   |

## 5

|                   |            |
|-------------------|------------|
| Zn(1)-N(1)        | 2.078(4)   |
| Zn(1)-O(4)A       | 2.171(4)   |
| Zn(1)-O(1)C       | 2.216(4)   |
| O(1)-Zn(1)-O(4)A  | 84.27(16)  |
| N(1)-Zn(1)-O(4)A  | 90.34(17)  |
| O(3)-Zn(1)-O(1)C  | 89.66(15)  |
| O(1W)-Zn(1)-O(1)C | 89.61(17)  |
| O(1)-Zn(1)-O(1)C  | 81.46(16)  |
| N(1)-Zn(1)-O(1)C  | 159.60(16) |
| O(4)A-Zn(1)-O(1)C | 80.46(16)  |

## 6

|                   |            |
|-------------------|------------|
| Eu(1)-O(1W)       | 2.415(4)   |
| Eu(1)-O(5)        | 2.433(4)   |
| Eu(1)-O(6)C       | 2.443(3)   |
| Eu(1)-N(2)A       | 2.567(4)   |
| O(1W)-Eu(1)-O(5)  | 73.22(15)  |
| O(2)B-Eu(1)-O(6)C | 78.47(13)  |
| O(3)B-Eu(1)-O(6)C | 76.27(12)  |
| O(1)-Eu(1)-O(6)C  | 99.91(14)  |
| O(4)A-Eu(1)-O(6)C | 145.39(12) |
| O(1W)-Eu(1)-O(6)C | 93.68(14)  |
| O(5)-Eu(1)-O(6)C  | 66.54(12)  |
| O(2)B-Eu(1)-N(2)A | 84.49(13)  |
| O(3)B-Eu(1)-N(2)A | 74.20(12)  |
| O(1)-Eu(1)-N(2)A  | 101.38(15) |
| O(4)A-Eu(1)-N(2)A | 64.20(12)  |
| O(1W)-Eu(1)-N(2)A | 86.78(14)  |
| O(5)-Eu(1)-N(2)A  | 141.86(12) |
| O(6)C-Eu(1)-N(2)A | 148.79(12) |

## 7

|             |          |
|-------------|----------|
| Tb(1)-O(1)  | 2.373(4) |
| Tb(1)-O(5)  | 2.400(4) |
| Tb(1)-O(6)C | 2.418(4) |

|                   |            |                   |            |
|-------------------|------------|-------------------|------------|
| Tb(1)-O(1W)       | 2.365(5)   | Tb(1)-N(2)        | 2.536(5)   |
| O(3)A-Tb(1)-O(2)A | 76.14(15)  | O(1)-Tb(1)-O(5)   | 78.07(15)  |
| O(3)A-Tb(1)-O(4)B | 76.06(16)  | O(3)A-Tb(1)-O(6)C | 78.91(17)  |
| O(2)A-Tb(1)-O(4)B | 152.15(16) | O(2)A-Tb(1)-O(6)C | 76.29(15)  |
| O(3)A-Tb(1)-O(1W) | 147.78(17) | O(4)B-Tb(1)-O(6)C | 99.70(17)  |
| O(2)A-Tb(1)-O(1W) | 71.65(16)  | O(1W)-Tb(1)-O(6)C | 92.65(19)  |
| O(4)B-Tb(1)-O(1W) | 136.17(17) | O(1)-Tb(1)-O(6)C  | 144.88(15) |
| O(3)A-Tb(1)-O(1)  | 128.77(16) | O(5)-Tb(1)-O(6)C  | 66.95(14)  |
| O(2)A-Tb(1)-O(1)  | 126.38(15) | O(3)A-Tb(1)-N(2)  | 84.31(17)  |
| O(4)B-Tb(1)-O(1)  | 72.08(15)  | O(2)A-Tb(1)-N(2)  | 74.09(16)  |
| O(1W)-Tb(1)-O(1)  | 73.81(17)  | O(4)B-Tb(1)-N(2)  | 101.68(18) |
| O(3)A-Tb(1)-O(5)  | 128.73(17) | O(1W)-Tb(1)-N(2)  | 87.59(19)  |
| O(2)A-Tb(1)-O(5)  | 126.88(16) | O(1)-Tb(1)-N(2)   | 64.67(15)  |
| O(4)B-Tb(1)-O(5)  | 73.53(18)  | O(5)-Tb(1)-N(2)   | 141.68(16) |
| O(1W)-Tb(1)-O(5)  | 73.16(19)  | O(6)C-Tb(1)-N(2)  | 148.67(15) |

---

Symmetry code: For **1**, A:  $-x, -y+1, z+1/2$ ; B:  $x+1/2, -y+1, z$ ; C:  $-x+1/2, y, z+1/2$ . For **2**, A:  $-x, -y, -z+2$ ; B:  $x-1, y-1, z$ ; C:  $-x+1, -y+1, -z+1$ ; D:  $-x+2, -y+2, -z+1$ . For **3**, A:  $x, y+1, z$ ; B:  $-x+1, -y+3, -z$ ; C:  $-x+2, -y+2, -z$ ; D:  $-x+1, -y+1, -z+1$ ; E:  $x, y-1, z$ ; F:  $-x+1, -y, -z+1$ . For **4**, A:  $-x+3/2, y+1/2, -z+1/2$ ; B:  $x, y+1, z$ ; C:  $x-1/2, -y+3/2, z-1/2$ ; D:  $-x+2, -y+2, -z$ . For **5**, A:  $-x+1/2, -y+1/2, -z$ ; B:  $-x+1, y, -z+1/2$ ; C:  $-x+1, -y+1, -z$ . For **6**, A:  $-x+2, y+1/2, -z+3/2$ ; B:  $-x+2, -y+2, -z+2$ ; C:  $-x+1, -y+2, -z+2$ . For **7**, A:  $x, -y+1/2, z+1/2$ ; B:  $-x+2, y-1/2, -z+3/2$ ; C:  $-x+1, -y, -z+2$ .
